# Supplementary material for: Evaluation of a Targeted Next-Generation Sequencing Panel for the Non-Invasive Detection of Variants in Circulating DNA of Colorectal Cancer
Source: MDPI journal article supplement (doi:10.3390/jcm10194487), 2021-09-29
Supplement: s1 [file s1]

**Table S1.** Characteristics of the *KRAS* assays used by ddPCR.

| Gene        | Assay ID       | COSMIC ID | Expected variant |              |
|-------------|----------------|-----------|------------------|--------------|
|             |                |           | AA mutation      | CDS mutation |
| <i>KRAS</i> | dHsaMDV2010001 | COSM521   | p.G12D           | c.35G>A      |
|             | dHsaMDV2510588 | COSM517   | p.G12S           | c.34G>A      |
|             | dHsaMDV2510598 | COSM532   | p.G13D           | c.38G>A      |

AA, aminoacid; CDS, coding sequence.

**Table S2.** List of genes analyzed in DNA by the TST170 panel.

| <b>SNVs and Indels</b> |               |                |              |               |               |               |                |                |                |
|------------------------|---------------|----------------|--------------|---------------|---------------|---------------|----------------|----------------|----------------|
| <i>AKT1</i>            | <i>BRIP1</i>  | <i>CREBBP</i>  | <i>FANCI</i> | <i>FGFR2</i>  | <i>JAK3</i>   | <i>MSH3</i>   | <i>PALB2</i>   | <i>RAD51D</i>  | <i>TSC1</i>    |
| <i>AKT2</i>            | <i>BTK</i>    | <i>CSF1R</i>   | <i>FANCL</i> | <i>FGFR3</i>  | <i>KDR</i>    | <i>MSH6</i>   | <i>PDGFRA</i>  | <i>RAD54L</i>  | <i>TSC2</i>    |
| <i>AKT3</i>            | <i>CARD11</i> | <i>CTNNB1</i>  | <i>FBXW7</i> | <i>FGFR4</i>  | <i>KIT</i>    | <i>MTOR</i>   | <i>PDGFRB</i>  | <i>RB1</i>     | <i>VHL</i>     |
| <i>ALK</i>             | <i>CCND1</i>  | <i>DDR2</i>    | <i>FGF1</i>  | <i>FLT1</i>   | <i>KMT2A</i>  | <i>MUTYH</i>  | <i>PIK3CA</i>  | <i>RET</i>     | <i>XRCC2</i>   |
| <i>APC</i>             | <i>CCND2</i>  | <i>DNMT3A</i>  | <i>FGF10</i> | <i>FLT3</i>   | <i>KRAS</i>   | <i>MYC</i>    | <i>PIK3CB</i>  | <i>RICTOR</i>  | <i>TSC1</i>    |
| <i>AR</i>              | <i>CCNE1</i>  | <i>EGFR</i>    | <i>FGF14</i> | <i>FOXL2</i>  | <i>MAP2K1</i> | <i>MYCL1</i>  | <i>PIK3CD</i>  | <i>ROS1</i>    | <i>TSC2</i>    |
| <i>ARID1A</i>          | <i>CD79A</i>  | <i>EP300</i>   | <i>FGF2</i>  | <i>GEN1</i>   | <i>MAP2K2</i> | <i>MYCN</i>   | <i>PIK3CG</i>  | <i>RPS6KB1</i> |                |
| <i>ATM</i>             | <i>CD79B</i>  | <i>ERBB2</i>   | <i>FGF23</i> | <i>GNA11</i>  | <i>MCL1</i>   | <i>MYD88</i>  | <i>PIK3R1</i>  | <i>SLX4</i>    |                |
| <i>ATR</i>             | <i>CDH1</i>   | <i>ERBB3</i>   | <i>FGF3</i>  | <i>GNAQ</i>   | <i>MDM2</i>   | <i>NBN</i>    | <i>PMS2</i>    | <i>SMAD4</i>   |                |
| <i>BAP1</i>            | <i>CDK12</i>  | <i>ERBB4</i>   | <i>FGF4</i>  | <i>GNAS</i>   | <i>MDM4</i>   | <i>NF1</i>    | <i>PPP2R2A</i> | <i>SMARCB1</i> |                |
| <i>BARD1</i>           | <i>CDK4</i>   | <i>ERCC1</i>   | <i>FGF5</i>  | <i>HNF1A</i>  | <i>MET</i>    | <i>NOTCH1</i> | <i>PTCH1</i>   | <i>SMO</i>     |                |
| <i>BCL2</i>            | <i>CDK6</i>   | <i>ERCC2</i>   | <i>FGF6</i>  | <i>HRAS</i>   | <i>MLH1</i>   | <i>NOTCH2</i> | <i>PTEN</i>    | <i>SRC</i>     |                |
| <i>BCL6</i>            | <i>CDKN2A</i> | <i>ERG</i>     | <i>FGF7</i>  | <i>IDH1</i>   | <i>MLLT3</i>  | <i>NOTCH3</i> | <i>PTPN11</i>  | <i>STK11</i>   |                |
| <i>BRAF</i>            | <i>CEBPA</i>  | <i>ESR1</i>    | <i>FGF8</i>  | <i>IDH2</i>   | <i>MPL</i>    | <i>NPM1</i>   | <i>RAD51</i>   | <i>TERT</i>    |                |
| <i>BRCA1</i>           | <i>CHEK1</i>  | <i>EZH2</i>    | <i>FGF9</i>  | <i>INPP4B</i> | <i>MRE11A</i> | <i>NRAS</i>   | <i>RAD51B</i>  | <i>TET2</i>    |                |
| <i>BRCA2</i>           | <i>CHEK2</i>  | <i>FAM175A</i> | <i>FGFR1</i> | <i>JAK2</i>   | <i>MSH2</i>   | <i>NRG1</i>   | <i>RAD51C</i>  | <i>TP53</i>    |                |
| <b>CNVs</b>            |               |                |              |               |               |               |                |                |                |
| <i>AKT2</i>            | <i>BRCA2</i>  | <i>CHEK1</i>   | <i>ERCC2</i> | <i>FGF2</i>   | <i>FGF7</i>   | <i>FGFR4</i>  | <i>MDM4</i>    | <i>NRG1</i>    | <i>RAF1</i>    |
| <i>ALK</i>             | <i>CCND1</i>  | <i>CHEK2</i>   | <i>ESR1</i>  | <i>FGF23</i>  | <i>FGF8</i>   | <i>JAK2</i>   | <i>MET</i>     | <i>PDGFRA</i>  | <i>RET</i>     |
| <i>AR</i>              | <i>CCND3</i>  | <i>EGFR</i>    | <i>FGF1</i>  | <i>FGF3</i>   | <i>FGF9</i>   | <i>KIT</i>    | <i>MYC</i>     | <i>PDGFRB</i>  | <i>RICTOR</i>  |
| <i>ATM</i>             | <i>CCNE1</i>  | <i>ERBB2</i>   | <i>FGF10</i> | <i>FGF4</i>   | <i>FGFR1</i>  | <i>KRAS</i>   | <i>MYCL1</i>   | <i>PIK3CA</i>  | <i>RPS6KB1</i> |
| <i>BRAF</i>            | <i>CDK4</i>   | <i>ERBB3</i>   | <i>FGF14</i> | <i>FGF5</i>   | <i>FGFR2</i>  | <i>LAMP1</i>  | <i>MYCN</i>    | <i>PIK3CB</i>  | <i>TFRC</i>    |
| <i>BRCA1</i>           | <i>CDK6</i>   | <i>ERCC1</i>   | <i>FGF19</i> | <i>FGF6</i>   | <i>FGFR3</i>  | <i>MDM2</i>   | <i>NRAS</i>    | <i>PTEN</i>    |                |

SNVs, single nucleotide variants; indels, insertion/deletion; CNVs, copy number variants.

**Table S3.** Quantity of cfDNA used for TST170 assay.

| Sample ID | cfDNA (ng) |
|-----------|------------|
| CRC032    | 40         |
| CRC035    | 50         |
| CRC062    | 100        |
| CRC095    | 35         |
| CRC100    | 40         |
| CRC106    | 35         |
| CRC112    | 100        |
| CRC116    | 100        |
| CRC131    | 100        |
| CRC133    | 100        |
| CRC137    | 40         |
| CRC142    | 40         |
| CRC145    | 35         |
| CRC152    | 40         |
| CRC154    | 40         |
| CRC158    | 40         |
| CRC160    | 40         |
| CRC164    | 40         |
| CRC168    | 40         |

**Table S4.** Tumor location of mCRC patients included in the study.

| Sample ID | Primary tumor location | Metastasis location |      |            |            | Tissue biopsy location  |
|-----------|------------------------|---------------------|------|------------|------------|-------------------------|
|           |                        | Liver               | Lung | Peritoneal | Lymph Node |                         |
| CRC032    | Right Colon            | Yes                 | No   | No         | No         | Primary                 |
| CRC035    | Right Colon            | No                  | No   | Yes        | No         | Primary                 |
| CRC062    | Left Colon/rectum      | Yes                 | Yes  | No         | No         | Primary                 |
| CRC095    | Left Colon/rectum      | Yes                 | Yes  | No         | No         | Primary                 |
| CRC100    | Right Colon            | No                  | Yes  | Yes        | Yes        | Metastasis (lymph node) |
| CRC106    | Right Colon            | No                  | Yes  | No         | Yes        | Primary                 |
| CRC112    | Right Colon            | Yes                 | No   | No         | No         | Unknown                 |
| CRC116    | Left Colon/rectum      | Yes                 | No   | No         | No         | Primary                 |
| CRC131    | Left Colon/rectum      | Yes                 | Yes  | No         | No         | Primary                 |
| CRC133    | Right Colon            | Yes                 | No   | No         | No         | Unknown                 |
| CRC137    | Left Colon/rectum      | No                  | No   | Yes        | No         | Primary                 |
| CRC142    | Left Colon/rectum      | No                  | Yes  | No         | Yes        | Metastasis (lung)       |
| CRC145    | Left Colon/rectum      | No                  | No   | Yes        | No         | Unknown                 |
| CRC152    | Left Colon/rectum      | No                  | Yes  | No         | Yes        | Primary                 |
| CRC154    | Left Colon/rectum      | Yes                 | Yes  | No         | No         | Primary                 |
| CRC158    | Left Colon/rectum      | Yes                 | Yes  | No         | No         | Primary                 |
| CRC160    | Left Colon/rectum      | No                  | No   | No         | Yes        | Primary                 |
| CRC164    | Right Colon            | No                  | Yes  | Yes        | Yes        | Primary                 |
| CRC168    | Right Colon            | Yes                 | No   | No         | Yes        | Primary                 |

**Table S5. Analysis of variants in the reference standard cfDNA by TST170.**

| Gene          | Variant type | Expected variant  | Expected VAF (%) | Detected variant  |            | Detected VAF (%) |            |
|---------------|--------------|-------------------|------------------|-------------------|------------|------------------|------------|
|               |              |                   |                  | 40 ng DNA         | 100 ng DNA | 40 ng DNA        | 100 ng DNA |
| <i>GNA11</i>  | SNV          | p.Q209L           | 5.6              | p.Q209L           |            | 5.5              | 4.6        |
| <i>AKT1</i>   | SNV          | p.E17K            | 5.0              | p.E17K            |            | 4.2              | 3.6        |
| <i>PIK3CA</i> | SNV          | p.E545K           | 5.6              | p.E545K           |            | 5.0              | 4.3        |
| <i>EGFR</i>   | Indel        | p.V769_D770insASV | 5.6              | p.V769_D770insASV |            | 2.9              | 2.8        |
| <i>EGFR</i>   | Indel        | p.E746_A750       | 5.3              | p.E746_A750       |            | 4.4              | 4.1        |
| <i>MET</i>    | CNV          | Amplification     | 4.5*             | Amplification     |            | 1.8*             | 1.8*       |
| <i>MYCN</i>   | CNV          | Amplification     | 9.5*             | Amplification     |            | 4.0*             | 3.6*       |

\*Fold change; SNV, single nucleotide variant; Indel, insertion/deletion; CNV, copy number variant; VAF, variant allele fraction; ng, nanograms.

**Table S6.** List of genes with variants (frameshift, inframe, missense, stop gain) detected in cfDNA of mCRC patients by TST170.

[illegible]

|  |  |  |  |  |  |  |  |  |              |
|--|--|--|--|--|--|--|--|--|--------------|
|  |  |  |  |  |  |  |  |  | <i>ROS1</i>  |
|  |  |  |  |  |  |  |  |  | <i>SMAD4</i> |
|  |  |  |  |  |  |  |  |  | <i>TET2</i>  |
|  |  |  |  |  |  |  |  |  | <i>TP53</i>  |
|  |  |  |  |  |  |  |  |  | <i>TSC2</i>  |

CRC, colorectal cancer patient.

**Table S7.** List of genes with variants (frameshift, inframe, missense, stop gain) detected in cfDNA of mCRC patients by TST170.

| CRC137  | CRC142  | CRC145  | CRC152  | CRC154  | CRC158 | CRC160 | CRC164  | CRC168  |
|---------|---------|---------|---------|---------|--------|--------|---------|---------|
| FAM175A | FAM175A | FAM175A | FAM175A | FAM175A | ALK    | ALK    | FAM175A | FAM175A |
| ALK     | ALK     | ALK     | ALK     | ALK     | APC    | APC    | ALK     | AKT2    |
| APC     | APC     | APC     | APC     | APC     | ARID1A | ATM    | APC     | ALK     |
| AR      | ATM     | AR      | ARID1A  | ATM     | ATM    | ATR    | AR      | APC     |
| ATM     | ATR     | ARID1A  | ATM     | ATR     | ATR    | BARD1  | ATM     | AR      |
| ATR     | BARD1   | ATM     | ATR     | BARD1   | BARD1  | BRCA1  | ATR     | ATM     |
| BARD1   | BCL6    | ATR     | BARD1   | BCL6    | BRCA2  | BRCA2  | BARD1   | ATR     |
| BRCA1   | BRCA1   | BARD1   | BRCA1   | BRCA1   | BRIP1  | BRIP1  | BRCA2   | BARD1   |
| BRCA2   | BRCA2   | BRCA1   | BRCA2   | BRCA2   | CCNE1  | CDKN2A | CHEK1   | BRCA1   |
| CCNE1   | BRIP1   | BRCA2   | BRIP1   | BRIP1   | CD79A  | CHEK1  | EP300   | BRCA2   |
| CHEK1   | CHEK1   | BRIP1   | CHEK1   | CARD11  | CDK12  | EP300  | ERBB2   | CEBPA   |
| DNMT3A  | DNMT3A  | CARD11  | EP300   | CEBPA   | CHEK1  | ERBB2  | ERBB3   | CHEK1   |
| ERBB2   | ERBB2   | CHEK1   | ERBB2   | CHEK1   | CSF1R  | FANCI  | ERCC2   | CSF1R   |
| ERCC2   | ERCC2   | DDR2    | FANCI   | CSF1R   | DDR2   | FGFR4  | FANCI   | EGFR    |
| FANCI   | FANCI   | EP300   | FGF23   | EGFR    | DNMT3A | FLT3   | FGF23   | ERBB2   |
| FGF6    | FGF2    | ERBB2   | FGFR4   | ERBB2   | EP300  | FOXL2  | FGFR4   | FGF1    |
| FGFR4   | FGFR4   | FANCI   | FLT3    | ERBB4   | ERBB2  | GEN1   | FLT3    | FGF23   |
| FLT3    | FLT3    | FGF6    | GEN1    | ERCC2   | ERCC2  | HNF1A  | GEN1    | FGF6    |
| GEN1    | GEN1    | FGFR4   | GNAS    | FANCI   | EZH2   | KDR    | GNAS    | FGFR4   |
| KMT2A   | HNF1A   | FLT3    | HNF1A   | FGF6    | FANCI  | KRAS   | HNF1A   | FLT3    |
| MET     | JAK3    | GEN1    | KDR     | FGFR4   | FGF6   | MLLT3  | JAK2    | GEN1    |
| MLLT3   | KDR     | KDR     | KIT     | FLT3    | FGFR4  | MSH2   | KDR     | GNAS    |
| MSH3    | KIT     | MAP2K2  | KRAS    | GEN1    | FLT3   | MSH3   | KIT     | HNF1A   |
| MUTYH   | MLH1    | MLH1    | MLLT3   | HNF1A   | GEN1   | MSH6   | KRAS    | KDR     |
| MYCL1   | MSH3    | MLLT3   | MSH2    | KDR     | HNF1A  | MUTYH  | MLH1    | KIT     |
| NRG1    | MUTYH   | MSH2    | MSH3    | KIT     | IDH1   | MYCL1  | MLLT3   | KRAS    |
| RAD51B  | MYCL1   | MSH3    | MSH6    | KMT2A   | KRAS   | NBN    | MSH3    | MLLT3   |
| RAD51D  | NOTCH3  | MUTYH   | MYCL1   | KRAS    | MLH1   | NF1    | MSH6    | MRE11A  |
| RAD54L  | NRG1    | MYCL1   | NBN     | MLLT3   | MRE11A | NOTCH3 | MYC     | MSH3    |
| RET     | PALB2   | NOTCH3  | NF1     | MRE11A  | MSH3   | NRG1   | MYCL1   | MSH6    |
| RICTOR  | PIK3CG  | PIK3CG  | NOTCH1  | MSH3    | MYCL1  | PALB2  | NBN     | MUTYH   |
| ROS1    | PTCH1   | PIK3R1  | NOTCH2  | MSH6    | NBN    | PDGFRB | NOTCH2  | MYCL1   |
| TET2    | RAD51B  | PTCH1   | NOTCH3  | MUTYH   | NF1    | PIK3CA | NOTCH3  | NBN     |
| TP53    | RAD51D  | RAD51B  | NRG1    | MYCL1   | NOTCH3 | PIK3R1 | NRG1    | NOTCH1  |
| XRCC2   | RET     | RAD51D  | PTCH1   | NBN     | NRG1   | PTEN   | PTCH1   | NOTCH3  |
|         | RICTOR  | TET2    | PTEN    | NOTCH3  | PDGFRB | RET    | PTEN    | NRG1    |
|         | ROS1    | TP53    | RAD51D  | NRG1    | PIK3CA | RICTOR | RET     | PIK3CA  |
|         | TET2    | TSC1    | RET     | PALB2   | PIK3R1 | ROS1   | RICTOR  | PTCH1   |
|         | TP53    |         | RICTOR  | PIK3CG  | PTCH1  | TET2   | ROS1    | PTEN    |
|         | TSC1    |         | SMAD4   | PTCH1   | PTEN   | TP53   | TET2    | RET     |
|         | XRCC2   |         | TET2    | PTEN    | RAD51D | XRCC2  | TP53    | RICTOR  |
|         |         |         | TP53    | RICTOR  | RET    |        | TSC1    | ROS1    |
|         |         |         | VHL     | ROS1    | RICTOR |        |         | SMAD4   |
|         |         |         |         | TET2    | SLX4   |        |         | TP53    |
|         |         |         |         | TP53    | TET2   |        |         |         |
|         |         |         |         | XRCC2   | TP53   |        |         |         |

CRC, colorectal cancer patient.



**Table S8.** CNVs detected in cfDNA of patient CRC100 by TST170

| Gene         | Variant type | Alteration    | FC   |
|--------------|--------------|---------------|------|
| <i>FGF6</i>  | CNV          | Amplification | 4.59 |
| <i>FGF23</i> | CNV          | Amplification | 4.93 |

FC, fold change; CNV, copy number variant.

**Table S9.** *NRAS* status in cfDNA of mCRC patients analyzed by BEAMing and TST170.

| Sample ID | <i>NRAS</i>  |        |
|-----------|--------------|--------|
|           | BEAMing      | TST170 |
| CRC032    | WT           | WT     |
| CRC035    | NA           | WT     |
| CRC062    | NA           | WT     |
| CRC095    | WT           | WT     |
| CRC100    | WT           | WT     |
| CRC106    | WT           | WT     |
| CRC112    | NA           | WT     |
| CRC116    | WT           | WT     |
| CRC131    | WT           | WT     |
| CRC133    | WT           | WT     |
| CRC137    | WT           | WT     |
| CRC142    | WT           | WT     |
| CRC145    | WT           | WT     |
| CRC152    | WT           | WT     |
| CRC154    | WT           | WT     |
| CRC158    | WT           | WT     |
| CRC160    | WT           | WT     |
| CRC164    | M            | ND     |
|           | (VAF: 0.12%) |        |
| CRC168    | WT           | WT     |

WT, wild type; M, Mutated; VAF, variant allele fraction; NA, not available.

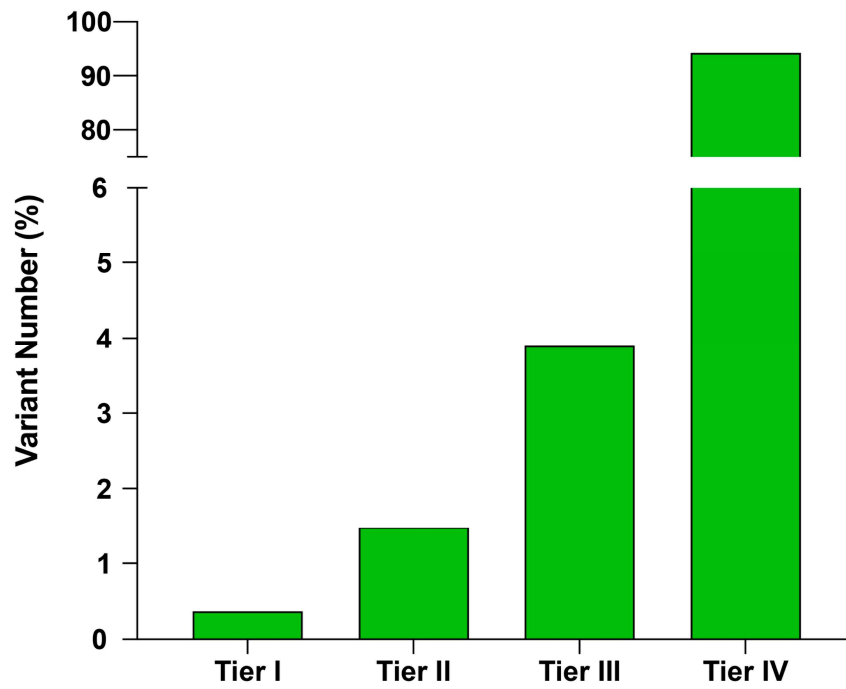

**Figure S1.** Distribution of variants detected by TST170 in cfDNA of mCRC patients according to their clinical impact. Tier I, variants with strong clinical significance; tier II, variants with potential clinical significance; tier III, variants with unknown clinical significance; and tier IV, benign or likely benign variants.

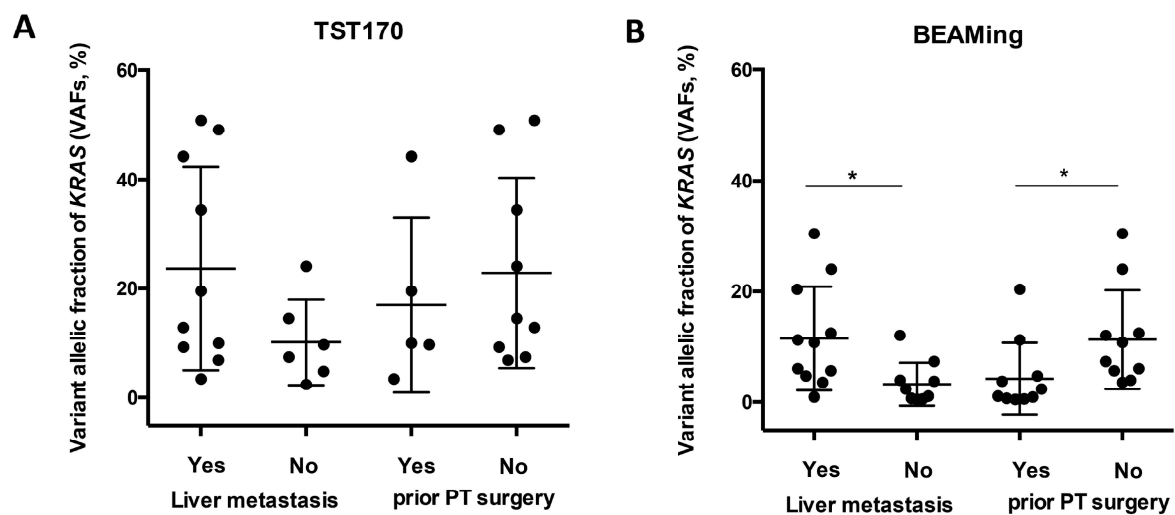

**Figure S2.** Impact of KRAS VAFs detected by TST170 and BEAMing on patient clinical-pathological characteristics. (A) Levels of KRAS VAFs obtained with TST170 according to metastasis location and previous surgery of primary tumor (PT). (B) KRAS VAFs obtained by BEAMing according to metastasis location and previous surgery for primary tumor (PT). P-values were calculated using Student's t-test. \*p<0.05.
